# Supplementary material for: Cocoa colonic phenolic metabolites are related to HDL-cholesterol raising effects and methylxanthine metabolites and insoluble dietary fibre to anti-inflammatory and hypoglycemic effects in humans
Source: PeerJ. 2020 Sep 17;8:e9953. doi: 10.7717/peerj.9953 (PMC7502235; doi:10.7717/peerj.9953)
Supplement: Supplemental Information 1 [file peerj-08-9953-s001.xlsx]

## Sheet: COCOA CC
EC-gluc		Volunteer		201	210	212	220	225	230	233	240	250	255	260	275	280		CC			MPC
7,8 min																			SD	SE		SD	SE
		0	Conc*Fdil			0	0	0					0		0	0		0	#NAME?	#NAME?	0	0	0
		0.5	Conc*Fdil			0.024409	0.023379	0.023452					0.023987		0.02282	0.023315		0.0235603	#NAME?	#NAME?	0.027098	0.016731	0.005915
		1	Conc*Fdil			0.024737	0.023886	0.024596					0.025679		0.024745	0.023693		0.024556	#NAME?	#NAME?	0.026513	0.018142	0.006414
		2	Conc*Fdil			0	0.024677	0.024392					0.024973		0.025149	0.024421		0.020602	#NAME?	#NAME?	0.022736	0.018848	0.006664
		3	Conc*Fdil			0	0	0.023187					0.023487		0.024221	0.02367		0.0157608	#NAME?	#NAME?	0.021948	0.018177	0.006426
		4	Conc*Fdil			0	0	0					0.023289		0	0		0.0038815	#NAME?	#NAME?	0.017929	0.019169	0.006777
		6	Conc*Fdil			0	0	0					0		0	0		0	#NAME?	#NAME?	0	0	0
		8	Conc*Fdil			0	0	0					0		0	0		0	#NAME?	#NAME?	0	0	0
																	MEAN	SD
			Cmax			#REF!	#REF!	#REF!					#REF!		#REF!	#REF!	#REF!	#NAME?
			Tmax			#REF!	#REF!	#REF!					#REF!		#REF!	#REF!	#REF!	#NAME?
			AUC			#REF!	#REF!	#REF!					#REF!		#REF!	#REF!	#REF!	#NAME?
1
Met-EC-sulf		Volunteer		201	210	212	220	225	230	233	240	250	255	260	275	280
12,3 min			tr (min)																SD	SE		SD	SE
		0	Conc*Fdil				0		0	0	0							0	#NAME?	#NAME?	0	0	0
		0.5	Conc*Fdil				0.027469		0.027701	0.028203	0.02754							0.0277282	#NAME?	#NAME?	0.018766	0.019446	0.007939
		1	Conc*Fdil				0.031991		0.030907	0.027665	0.030988							0.0303877	#NAME?	#NAME?	0.040381	0.001099	0.000448
		2	Conc*Fdil				0.035235		0.030524	0.025928	0.030237							0.030481	#NAME?	#NAME?	0.039843	0.015274	0.006236
		3	Conc*Fdil				0.029019		0.025608	0.024334	0.026253							0.0263035	#NAME?	#NAME?	0.037461	0.020344	0.008305
		4	Conc*Fdil				0.026047		0.024491	0	0.025423							0.0189903	#NAME?	#NAME?	0.018652	0.019929	0.008136
		6	Conc*Fdil				0		0	0	0							0	#NAME?	#NAME?	0	0.019151	0.007818
		8	Conc*Fdil				0		0	0	0							0	#NAME?	#NAME?	0	0.013393	0.005468
																	MEAN	SD
			Cmax				#REF!		#REF!	#REF!	#REF!						#REF!	#NAME?
			Tmax				#REF!		#REF!	#REF!	#REF!						#REF!	#NAME?
			AUC				#REF!		#REF!	#REF!	#REF!						#REF!	#NAME?
DHPV		Volunteer		201	210	212	220	225	230	233	240	250	255	260	275	280			SD	SE		SD	SE
		0	Conc*Fdil	0			0			0	0							0	#NAME?	#NAME?	0	0	0
		0.5	Conc*Fdil	0			0			0	0							0	#NAME?	#NAME?	0	0	0
		1	Conc*Fdil	0			0			0	0							0	#NAME?	#NAME?	0	0	0
		2	Conc*Fdil	0			0			0	0							0	#NAME?	#NAME?	0.007818	0.012611	0.003988
		3	Conc*Fdil	0			0.029081			0	0							0.00969367	#NAME?	#NAME?	0.02757	0.003794	0.0012
		4	Conc*Fdil	0.026947			0.043263			0.034235	0							0.0258327	#NAME?	#NAME?	0.033764	0.005359	0.001695
		6	Conc*Fdil	0.034076			0.040225			0.039166	0							0.0264637	#NAME?	#NAME?	0.034853	0.007966	0.002519
		8	Conc*Fdil	0.029041			0.027211			0	0.025433							0.017548	#NAME?	#NAME?	0.030341	0.005242	0.001658
																	MEAN	SD
			Cmax	#REF!			#REF!			#REF!	#REF!						#REF!	#NAME?
			Tmax	#REF!			#REF!			#REF!	#REF!						#REF!	#NAME?
			AUC	#REF!			#REF!			#REF!	#REF!						#REF!	#NAME?
Ec sulf		Volunteer		201	210	212	220	225	230	233	240	250	255	260	275	280		CC	SD	SE	MPC	SD	SE
		0	Conc*Fdil				0		0	0	0							0	#NAME?	#NAME?	0	0	0
		0.5	Conc*Fdil				0		0.02258	0.02258	0.035647							0.0202017	#NAME?	#NAME?	0.015192	0.020817	0.00931
		1	Conc*Fdil				0.02258		0.02258	0.02258	0.035792							0.025883	#NAME?	#NAME?	0.040302	0.003026	0.001353
		2	Conc*Fdil				0.02258		0.02258	0.02258	0.027985							0.0239312	#NAME?	#NAME?	0.025027	0.023156	0.010356
		3	Conc*Fdil				0.02258		0.02258	0.02258	0.02258							0.02258	#NAME?	#NAME?	0.023004	0.021001	0.009392
		4	Conc*Fdil				0.02258		0.02258	0	0.02258							0.016935	#NAME?	#NAME?	0.019179	0.022159	0.00991
		6	Conc*Fdil				0		0	0	0							0	#NAME?	#NAME?	0	0	0
		8	Conc*Fdil				0		0	0	0							0	#NAME?	#NAME?	0	0	0
																	MEDIA	SD
			Cmax				#REF!		#REF!	#REF!	#REF!						#REF!	#NAME?
			Tmax				1		1	1	#REF!						#REF!	#NAME?
			AUC				#REF!		#REF!	#REF!	#REF!						#REF!	#NAME?
2
DHPV sulf		Volunteer		201	210	212	220	225	230	233	240	250	255	260	275	280		CC	SD	SE	MPC	SD	SE
		0	Conc*Fdil		0	0	0	0	0.126461	0	0.030582	0		0	0	0		0.0142766	#NAME?	#NAME?	0.018442	0.061166	0.019343
		0.5	Conc*Fdil		0	0	0	0	0.114182	0	0.026847	0		0	0	0		0.0128208	#NAME?	#NAME?	0.019625	0.057186	0.018084
		1	Conc*Fdil		0	0	0	0	0.096876	0	0.028969	0		0	0	0		0.0114405	#NAME?	#NAME?	0.022862	0.054955	0.017378
		2	Conc*Fdil		0	0	0	0	0.096016	0	0.027597	0		0	0	0		0.0112375	#NAME?	#NAME?	0.036198	0.044482	0.014066
		3	Conc*Fdil		0	0.100755	0.231681	0	0.088539	0.06713	0.025402	0.03938		0.081507	0	0		0.0576722	#NAME?	#NAME?	0.126273	0.104628	0.033086
		4	Conc*Fdil		0	0.204797	0.619973	0.045209	0.103675	0.35213		0.683717		0.40138	0	0.151277		0.256216	#NAME?	#NAME?	0.28138	0.14709	0.046514
		6	Conc*Fdil		0.121102	0.305197	0.070872	0.475955	0.11414	0.538701	0.087813	0.483386		0.260214	0	0.125582		0.234815	#NAME?	#NAME?	0.286084	0.172341	0.054499
		8	Conc*Fdil		0	0.108778	0.191619	0.592275	0.092581	0.162123	0.107211	0.429044		0.0451	0.053071	0.129463		0.173751	#NAME?	#NAME?	0.195704	0.139567	0.044135
																	MEDIA	SD
			Cmax		#REF!	#REF!	#REF!	#REF!	#REF!	#REF!	#REF!	#REF!		#REF!	#REF!	#REF!	#REF!	#NAME?
			Tmax		#REF!	#REF!	#REF!	#REF!	#REF!	#REF!	#REF!	#REF!		#REF!	#REF!	#REF!	#REF!	#NAME?
			AUC		#REF!	#REF!	#REF!	#REF!	#REF!	#REF!		#REF!		#REF!	#REF!	#REF!	#REF!	#NAME?
5		Volunteer		201	210	212	220	225	230	233	240	250	255	260	275	280		CC	SD	SE	MPC	SD	SE
DHPV Gluc		0	Conc*Fdil		0	0	0			0		0		0				0	#NAME?	#NAME?	0.020887	0.061707	0.019513
		0.5	Conc*Fdil		0	0	0			0		0		0				0	#NAME?	#NAME?	0.022187	0.057967	0.018331
		1	Conc*Fdil		0	0	0			0		0		0				0	#NAME?	#NAME?	0.025809	0.05649	0.017864
		2	Conc*Fdil		0	0	0			0		0		0				0	#NAME?	#NAME?	0.041413	0.04909	0.015524
		3	Conc*Fdil		0	0	0			0		0		0				0	#NAME?	#NAME?	0.122439	0.11392	0.036025
		4	Conc*Fdil		0	0.030083	0			0.027542		0.028495		0.026439				0.0187598	#NAME?	#NAME?	0.282458	0.150841	0.0477
		6	Conc*Fdil		0.03718	0.032222	0.029025			0.032454		0.028506		0.023409				0.030466	#NAME?	#NAME?	0.3067	0.214884	0.067952
		8	Conc*Fdil		0.025607	0.026468	0.026533			0		0.025662		0				0.0173783	#NAME?	#NAME?	0.19675	0.140869	0.044547
																	MEDIA	SD
			Cmax		#REF!	#REF!	#REF!			#REF!		#REF!		#REF!			#REF!	#NAME?
			Tmax		#REF!	#REF!	#REF!			#REF!		#REF!		#REF!			#REF!	#NAME?
			AUC		#REF!	#REF!	#REF!			#REF!		#REF!		#REF!			#REF!	#NAME?
MHPV gluc		Volunteer		201	210	212	220	225	230	233	240	250	255	260	275	280		CC	SD	SE	MPC	SD	SE
		0	Conc*Fdil		0	0	0	0		0	0							0	#NAME?	#NAME?	0	0	0
		0.5	Conc*Fdil		0	0	0	0		0	0							0	#NAME?	#NAME?	0.002944	0.008833	0.002944
		1	Conc*Fdil		0	0	0	0		0	0							0	#NAME?	#NAME?	0.003067	0.0092	0.003067
		2	Conc*Fdil		0	0	0	0		0	0							0	#NAME?	#NAME?	0.002957	0.008872	0.002957
		3	Conc*Fdil		0	0	0	0		0.024484	0							0.00408067	#NAME?	#NAME?	0.002951	0.008852	0.002951
		4	Conc*Fdil		0	0.024549	0.024405	0		0.025921	0.025114							0.0166648	#NAME?	#NAME?	0.014912	0.014421	0.004807
		6	Conc*Fdil		0.023922	0	0.024448	0.024417		0.02258	0.026623							0.0203317	#NAME?	#NAME?	0.020525	0.011903	0.003968
		8	Conc*Fdil		0	0	0	0.023731		0	0.024273							0.00800067	#NAME?	#NAME?	0.017439	0.013194	0.004398
																	MEDIA	SD
			Cmax		#REF!	#REF!	#REF!	#REF!		#REF!	#REF!						#REF!	#NAME?
			Tmax		#REF!	#REF!	#REF!	#REF!		#REF!	#REF!						#REF!	#NAME?
			AUC		#REF!	#REF!	#REF!	#REF!		#REF!	#REF!						#REF!	#NAME?
DHP valerico OH gluc		Volunteer		201	210	212	220	225	230	233	240	250	255	260	275	280		CC	SD	SE		SD	SE
		0	Conc*Fdil		0		0	0	0	0	0	0		0				0	#NAME?	#NAME?	0	0	0
		0.5	Conc*Fdil		0		0	0	0	0	0	0		0				0	#NAME?	#NAME?	0	0	0
		1	Conc*Fdil		0		0	0	0	0	0	0		0				0	#NAME?	#NAME?	0	0.007742	0.002448
		2	Conc*Fdil		0		0	0	0	0	0	0		0				0	#NAME?	#NAME?	0	0.007367	0.00233
		3	Conc*Fdil		0		0	0.024725	0.026322	0	0	0.023207		0.023409				0.0122079	#NAME?	#NAME?	0.0137339	0.011909	0.003766
		4	Conc*Fdil		0		0.030636	0.027116	0.026096	0.027013	0.02919	0.023757		0.025196				0.0236255	#NAME?	#NAME?	0.0265787	0.002517	0.000796
		6	Conc*Fdil		0.02439		0.024544	0.023084	0	0.024825	0.024449	0.024968		0.023541				0.0212251	#NAME?	#NAME?	0.0208295	0.012579	0.003978
		8	Conc*Fdil		0		0	0.023247	0	0.023926	0	0.025702		0.023086				0.0119951	#NAME?	#NAME?	0.0134945	0.011879	0.003756
																	MEDIA	SD
			Cmax		#REF!		#REF!	#REF!	#REF!	#REF!	#REF!			#REF!			#REF!	#NAME?
			Tmax		#REF!		#REF!	#REF!	#REF!	#REF!	#REF!			#REF!			#REF!	#NAME?
			AUC		#REF!		#REF!	#REF!	#REF!	#REF!	#REF!			#REF!			#REF!	#NAME?

## Sheet: COCOA MPC
EC-gluc			201	210	212	220	225	230	233	240	250	255	260	275	280			MCP	DE	ES
7.8	0	Conc*Fdil		0	0	0	0		0	0		0			0			0	0	0
	0.5	Conc*Fdil		0.036158	0	0.035666	0.036526		0.036915	0.035717		0.035801			0			0.0270979	0.0167306	0.00591516
	1	Conc*Fdil		0	0	0.036888			0.039135	0.037373		0.036441			0.035756			0.0265133	0.0181419	0.00641413
	2	Conc*Fdil		0	0	0.038322	0.035262		0.036414	0.035754		0.036133			0			0.0227356	0.0188476	0.00666365
	3	Conc*Fdil		0	0.034962	0.03574	0		0.034962	0.034962		0.034962			0			0.0219485	0.018177	0.00642654
	4	Conc*Fdil		0	0.035442	0.036201	0		0.036236	0		0.035553			0			0.017929	0.0191689	0.00677722
	6	Conc*Fdil		0	0	0	0		0	0		0			0			0	0	0
	8	Conc*Fdil		0	0	0	0		0	0		0			0			0	0	0
																MEDIA	SD
		Cmax		#REF!	#REF!	#REF!	#REF!		#REF!	#REF!		#REF!			#REF!	#REF!	#REF!
		Tmax		#REF!	#REF!	#REF!	#REF!		#REF!	#REF!		#REF!			#REF!	#REF!	#REF!
		AUC		#REF!	#REF!	#REF!			#REF!	#REF!		#REF!			#REF!	#REF!	#REF!
																0.0283157
Met EC sulf 10,5		Volunteer	201	210	212	220	225	230	233	240	250	255	260	275	280			MCP	DE	ES
10.5	0	Conc*Fdil	0		0	0	0	0	0	0								0	0	0
only in II	0.5	Conc*Fdil	0.038876		0	0.041611	0	0.035709	0.041348	0.040666								0.0283157	0.019446	0.00793878
	1	Conc*Fdil	0.037057		0.035526	0.037694	0.039171	0.036853	0.037212	0.03772								0.037319	0.00109874	0.00044856
	2	Conc*Fdil	0.037276		0.03708	0.047463	0.037136	0	0.037891	0.038296								0.0335917	0.0152738	0.0062355
	3	Conc*Fdil	0		0	0.040666	0.036143	0	0.037278	0.037811								0.0216997	0.0203438	0.00830532
	4	Conc*Fdil	0		0	0.038785	0	0	0.036115	0.03686								0.0159657	0.0199286	0.00813583
	6	Conc*Fdil	0		0	0.036188	0	0	0.035679	0.035615								0.0153546	0.0191514	0.00781852
	8	Conc*Fdil	0		0	0.035434	0	0	0	0								0.005062	0.0133928	0.00546758
																Media	SD
		Cmax	#REF!		#REF!	#REF!	#REF!		#REF!	#REF!						#REF!	#REF!
		Tmax	#REF!		#REF!	#REF!	#REF!	#REF!	#REF!	#REF!						#REF!	#REF!
		AUC	#REF!		#REF!	#REF!	#REF!		#REF!	#REF!						#REF!	#REF!
Met-EC-sulf		Volunteer	201	210	212	220	225	230	233	240	250	255	260	275	280				DE	ES
12.2	0	Conc*Fdil				0		0				0	0					0	0	0
	0.5	Conc*Fdil				0		0.03692				0.038144	0					0.018766	0.0216749	0.0108374
	1	Conc*Fdil				0.039584		0.037903				0.041536	0.0425					0.0403807	0.00204938	0.00102469
	2	Conc*Fdil				0.038024		0.037085				0.042596	0.041666					0.0398428	0.00269677	0.00134838
	3	Conc*Fdil				0.036813		0.036129				0.038381	0.038519					0.0374605	0.00117755	0.000588776
	4	Conc*Fdil				0		0				0.037491	0.037116					0.0186518	0.0215377	0.0107689
	6	Conc*Fdil				0		0				0	0					0	0	0
	8	Conc*Fdil				0		0				0	0					0	0	0
																Media	SD
		Cmax				#REF!		#REF!				#REF!	#REF!			#REF!	#REF!
		Tmax				#REF!		#REF!				#REF!	#REF!			#REF!	#REF!
		AUC				#REF!		#REF!				#REF!	#REF!			#REF!	#REF!
EC-sulf		Volunteer	201	210	212	220	225	230	233	240	250	255	260	275	280				DE	ES
9.8	0	Conc*Fdil			0	0		0	0	0								0	0	0
	0.5	Conc*Fdil			0	0		0.039094	0	0.036865								0.0151918	0.0208172	0.00930971
	1	Conc*Fdil			0.035537	0.039296		0.041438	0.04196	0.043279								0.040302	0.00302569	0.00135313
	2	Conc*Fdil			0	0.047832		0.039256	0	0.038046								0.0250268	0.0231556	0.0103555
	3	Conc*Fdil			0	0.038621		0.038038	0	0.038361								0.023004	0.0210007	0.0093918
	4	Conc*Fdil			0	0.03929		0	0	0.037426								0.0153432	0.0210199	0.00940037
	6	Conc*Fdil			0	0		0	0	0								0	0	0
	8	Conc*Fdil			0	0		0	0	0								0	0	0
																Media	SD
		Cmax			#REF!	#REF!		#REF!	#REF!	#REF!						#REF!	#REF!
		Tmax			#REF!	#REF!		#REF!	#REF!	#REF!						#REF!	#REF!
		AUC			#REF!	#REF!		#REF!	#REF!	#REF!						#REF!	#REF!
DHPV		Volunteer	201	210	212	220	225	230	233	240	250	255	260	275	280				DE	ES
	0	Conc*Fdil	0	0	0	0	0	0	0	0		0	0					0	0	0
	0.5	Conc*Fdil	0	0	0	0	0	0	0	0		0	0					0	0	0
	1	Conc*Fdil	0	0	0	0	0	0	0	0		0	0					0	0	0
	2	Conc*Fdil	0.024337	0	0	0	0	0	0.027527	0.026317		0	0					0.0078181	0.0126112	0.00398801
	3	Conc*Fdil	0.027912	0.02334	0.028017	0.025397	0.026554	0.024369	0.036905	0.029657		0.027912	0.025637					0.02757	0.00379417	0.00119982
	4	Conc*Fdil	0.031946	0.031825	0.034235	0.039943	0.039627	0.024723	0.040784	0.026984		0.032884	0.034691					0.0337642	0.00535894	0.00169464
	6	Conc*Fdil	0.03025	0.027282	0.036773	0.04408	0.040055	0.026352	0.032396	0.025549		0.049314	0.03648					0.0348531	0.0079654	0.00251888
	8	Conc*Fdil	0.02634	0.032078	0.033632	0.036767	0.0343	0.025634	0.024749	0.027088		0.038275	0.024548					0.0303411	0.00524233	0.00165777
																Media	SD
		Cmax	#REF!	#REF!	#REF!	#REF!	#REF!	#REF!	#REF!	#REF!		#REF!	#REF!			#REF!	#REF!
		Tmax	#REF!	#REF!	#REF!	#REF!	#REF!	#REF!	#REF!	#REF!		#REF!	#REF!			#REF!	#REF!
		AUC	#REF!	#REF!	#REF!	#REF!	#REF!	#REF!	#REF!	#REF!		#REF!	#REF!			#REF!	#REF!
		Volunteer	201	210	212	220	225	230	233	240	250	255	260	275	280				DE	ES
DHPV gluc	0	Conc*Fdil	0	0	0	0	0	0	0.024096	0.205659		0	0		0			0.0208868	0.0617069	0.0195134
	0.5	Conc*Fdil	0	0	0	0	0	0.024386	0.02529	0.194376		0	0		0			0.0221865	0.0579669	0.0183307
	1	Conc*Fdil	0	0	0	0	0	0.02453	0.079686	0.179684		0	0		0			0.0258091	0.0564896	0.0178636
	2	Conc*Fdil	0.065583	0	0.034054	0	0.024599	0.028035	0.133071	0.12937		0	0.040833		0			0.0414132	0.0490898	0.0155236
	3	Conc*Fdil	0.159852	0.036166	0.126859	0.029155	0.101893	0.02513	0.387252	0.232129		0.175027	0.073371		0			0.122439	0.11392	0.0360247
	4	Conc*Fdil	0.317135	0.226827	0.289931	0.467229	0.42438	0.061087	0.482573	0.146234		0.370798	0.26927		0.051574			0.282458	0.150841	0.0477
	6	Conc*Fdil	0.248775	0.113888	0.31616	0.619835	0.392812	0.096655	0.269715	0.102947		0.749167	0.336		0.127749			0.3067	0.214884	0.0679523
	8	Conc*Fdil	0.120301	0.223291	0.258957	0.458593	0.28239	0.08309	0.062283	0.129546		0.404833	0.043795		0.097169			0.19675	0.140869	0.0445467
																Media	SD
		Cmax	#REF!	#REF!	#REF!	#REF!	#REF!	#REF!	#REF!	#REF!		#REF!	#REF!		#REF!	#REF!	#REF!
		Tmax	#REF!	#REF!	#REF!	#REF!	#REF!	#REF!	#REF!	#REF!		#REF!	#REF!		#REF!	#REF!	#REF!
		AUC	#REF!	#REF!	#REF!	#REF!	#REF!	#REF!	#REF!	#REF!		#REF!	#REF!		#REF!	#REF!	#REF!
DHPV sulf		Volunteer	201	210	212	220	225	230	233	240	250	255	260	275	280				DE	ES
	0	Conc*Fdil	0	0	0	0	0	0	0	0.202866		0	0		0			0.0184424	0.0611664	0.0193425
	0.5	Conc*Fdil	0	0	0	0	0	0	0.025358	0.190513		0	0		0			0.0196246	0.0571855	0.0180837
	1	Conc*Fdil	0	0	0	0	0	0	0.079221	0.172259		0	0		0			0.0228618	0.0549544	0.0173781
	2	Conc*Fdil	0.065583	0	0.033299	0	0	0.029842	0.125964	0.101218		0	0.04227		0			0.0361978	0.0444816	0.0140663
	3	Conc*Fdil	0.161591	0.036195	0.123867	0.082111	0.100151	0.048144	0.367252	0.227811		0.18003	0.061849		0			0.126273	0.104628	0.0330862
	4	Conc*Fdil	0.314912	0.223632	0.291178	0.459745	0.492216	0.066156	0.399131	0.146286		0.362656	0.282585		0.056684			0.28138	0.14709	0.0465138
	6	Conc*Fdil	0.248632	0.125429	0.322475	0.459745	0.411278	0.108054	0.263013	0.103886		0.645485	0.333486		0.12544			0.286084	0.172341	0.054499
	8	Conc*Fdil	0.119389	0.223609	0.261724	0.447081	0.275004	0.081316	0.063392	0.125486		0.411733	0.044118		0.099886			0.195703	0.139567	0.044135
																Media	SD
		Cmax	#REF!	#REF!	#REF!	#REF!	#REF!	#REF!	#REF!	#REF!		#REF!	#REF!		#REF!	#REF!	#REF!
		Tmax	#REF!	#REF!	#REF!		#REF!	#REF!	#REF!	#REF!		#REF!	#REF!		#REF!	#REF!	#REF!
		AUC	#REF!	#REF!	#REF!	#REF!	#REF!	#REF!	#REF!	#REF!		#REF!	#REF!		#REF!	#REF!	#REF!
MHPV gluc		Volunteer	201	210	212	220	225	230	233	240	250	255	260	275	280				DE	ES
	0	Conc*Fdil	0	0	0	0	0	0	0			0	0					0	0	0
	0.5	Conc*Fdil	0.026498	0	0	0	0	0	0			0	0					0.00294422	0.00883267	0.00294422
	1	Conc*Fdil	0.027599	0	0	0	0	0	0			0	0					0.00306656	0.00919967	0.00306656
	2	Conc*Fdil	0.026616	0	0	0	0	0	0			0	0					0.00295733	0.008872	0.00295733
	3	Conc*Fdil	0.026557	0	0	0	0	0	0			0	0					0.00295078	0.00885233	0.00295078
	4	Conc*Fdil	0.033714	0.024154	0.025821	0	0.024225	0	0.026297			0	0					0.0149123	0.0144212	0.00480705
	6	Conc*Fdil	0.031751	0.023444	0	0.028637	0.024669	0.024495	0			0.025334	0.026398					0.0205253	0.011903	0.00396767
	8	Conc*Fdil	0.029568	0.027083	0	0.027359	0.024175	0.024306	0			0.024463	0					0.0174393	0.0131944	0.00439815
																Media	SD
		Cmax	#REF!	#REF!	#REF!	#REF!	#REF!	#REF!	#REF!			#REF!	#REF!			#REF!	#REF!
		Tmax	#REF!	#REF!	#REF!	#REF!	#REF!	#REF!	#REF!			#REF!	#REF!			#REF!	#REF!
		AUC	#REF!	#REF!	#REF!	#REF!	#REF!	#REF!	#REF!			#REF!	#REF!			#REF!	#REF!
4
DHP valerico OH sulfato		Volunteer	201	210	212	220	225	230	233	240	250	255	260	275	280				DE	ES
	0	Conc*Fdil	0	0	0	0	0	0	0.025454	0.029697								0.00689388	0.0128152	0.00453087
	0.5	Conc*Fdil	0	0	0	0	0	0	0	0.0299								0.0037375	0.0105712	0.0037375
	1	Conc*Fdil	0	0	0	0	0	0	0	0.029801								0.00372513	0.0105362	0.00372513
	2	Conc*Fdil	0	0	0	0	0	0	0.027561	0.027741								0.00691275	0.0128	0.00452549
	3	Conc*Fdil	0.025992	0	0	0	0.024734	0	0.033192	0.029649								0.0141959	0.0153806	0.00543787
	4	Conc*Fdil	0.035609	0.030499	0.031459	0.035763	0.037322	0	0.046732	0.029057								0.0308051	0.0136084	0.00481131
	6	Conc*Fdil	0.032132	0.029277	0.033432	0.045172	0.043685	0	0.038724	0.025552								0.0309967	0.0142541	0.00503959
	8	Conc*Fdil	0.028255	0.035534	0.034038	0.03865	0.036285	0.024498	0.026398	0.028706								0.0315455	0.00521141	0.00184251
																Media	SD
		Cmax	#REF!	#REF!	#REF!	#REF!	#REF!	#REF!	#REF!	#REF!						#REF!	#REF!
		Tmax	#REF!	#REF!	#REF!	#REF!	#REF!	#REF!	#REF!							#REF!	#REF!
		AUC	#REF!	#REF!	#REF!	#REF!	#REF!	#REF!	#REF!	#REF!						#REF!	#REF!
DHP valerico OH gluc		Volunteer	201	210	212	220	225	230	233	240	250	255	260	275	280				DE	ES
	0	Conc*Fdil		0	0	0	0	0	0		0	0	0	0				0	0	0
	0.5	Conc*Fdil		0	0	0	0	0	0		0	0	0	0				0	0	0
	1	Conc*Fdil		0	0	0	0	0	0		0	0	0.024481	0				0.0024481	0.00774157	0.0024481
	2	Conc*Fdil		0	0	0	0	0	0		0	0	0.023298	0				0.0023298	0.00736747	0.0023298
	3	Conc*Fdil		0.02258	0.026196	0.024989	0	0	0		0	0	0	0				0.0073765	0.011909	0.00376594
	4	Conc*Fdil		0.026724	0.032117	0.02956	0.025324	0.02952	0.029944		0.025107	0.028319	0.025464	0.025054				0.0277133	0.00251708	0.000795972
	6	Conc*Fdil		0.024368	0.025639	0.023763	0	0	0		0.022654	0.025065	0	0.024384				0.0145873	0.0125786	0.00397769
	8	Conc*Fdil		0.025651	0.024394	0	0	0	0		0.02367	0	0	0				0.0073715	0.0118786	0.00375636
																Media	SD
		Cmax		#REF!	#REF!	#REF!	#REF!	#REF!	#REF!		#REF!	#REF!	#REF!	#REF!		#REF!	#REF!
		Tmax		#REF!	#REF!	#REF!	#REF!	#REF!	#REF!		#REF!	#REF!	#REF!	#REF!		#REF!	#REF!
		AUC		#REF!	#REF!	#REF!	#REF!	#REF!	#REF!		#REF!	#REF!	#REF!	#REF!		#REF!	#REF!
					vamos a decir trazas
DHP valerico sulfato		Volunteer	201	210	212	220	225	230	233	240	250	255	260	275	280				DE	ES
	0	Conc*Fdil		0	0		0	0.024802	0.027068	0	0							0.00741	0.0126719	0.00478952
	0.5	Conc*Fdil		0	0.026378		0.024189	0.024317	0.027188	0	0							0.0145817	0.013681	0.00517095
	1	Conc*Fdil		0	0.027517		0.024268	0.024016	0.025081	0.02258	0							0.0176374	0.0121398	0.00458842
	2	Conc*Fdil		0.024972	0.024347		0.025065	0.024157	0.02657	0.023977	0.025213							0.0249001	0.000878357	0.003
	3	Conc*Fdil		0.026753	0		0	0.023459	0	0	0.024386							0.0106569	0.0133276	0.00503735
	4	Conc*Fdil		0.024236	0		0	0.02356	0	0	0							0.006828	0.0116627	0.00440807
	6	Conc*Fdil		0.023369	0		0	0.023745	0	0	0							0.00673057	0.0114952	0.00434476
	8	Conc*Fdil		0	0		0	0.023994	0.0244	0	0							0.00691343	0.0118075	0.00446282
																Media	SD
		Cmax		#REF!	#REF!		#REF!	#REF!	#REF!		#REF!					#REF!	#REF!
		Tmax		#REF!	#REF!		#REF!	#REF!	#REF!		#REF!					#REF!	#REF!
		AUC		#REF!	#REF!		#REF!	#REF!	#REF!		#REF!					#REF!	#REF!
3
HPV sulfato
trazas en CC y se ve en CCPP
		Volunteer	201	210	212	220	225	230	233	240	250	255	260	275	280				DE	ES
	0	Conc*Fdil	0	0	0	0			0	0								0	0	0
	0.5	Conc*Fdil	0	0	0	0			0	0								0	0	0
	1	Conc*Fdil	0	0	0	0			0.027577	0.041744								0.006	0.0184508	0.004
	2	Conc*Fdil	0	0	0	0			0.028781	0.035709								0.0107483	0.0167948	0.00634782
	3	Conc*Fdil	0.026214	0	0	0.027369			0.037131	0.058432								0.0248577	0.0224581	0.00848835
	4	Conc*Fdil	0.031723	0.02564	0	0.029126			0.050857	0.040933								0.0297132	0.017186	0.0064957
	6	Conc*Fdil	0.02596	0	0.023427	0.042159			0.033131	0.03412								0.0264662	0.0145548	0.00550121
	8	Conc*Fdil	0	0.025414	0.024007	0.044918			0.025102	0.035197								0.025773	0.0149886	0.00566515
																Media	SD
		Cmax	#REF!	#REF!	#REF!	#REF!			#REF!	#REF!						#REF!	#REF!
		Tmax	#REF!	#REF!	#REF!	#REF!			#REF!	#REF!						#REF!	#REF!
		AUC	#REF!	#REF!	#REF!	#REF!			#REF!	#REF!						#REF!	#REF!

## Sheet: Most important metabolites CC 
1
Met-EC-sulf		Time	201	210	212	220	225	230	233	240	250	255	260	275	280
12,3 min
	m1	0				0		0	0	0
	m1	0.5				0.027469		0.027701	0.028203	0.02754
	m1	1				0.031991		0.030907	0.027665	0.030988
	m1	2				0.035235		0.030524	0.025928	0.030237
	m1	3				0.029019		0.025608	0.024334	0.026253
	m1	4				0.026047		0.024491	0	0.025423
	m1	6				0		0	0	0
	m1	8				0		0	0	0
2
DHPV sulf			201	210	212	220	225	230	233	240	250	255	260	275	280
	m2	0		0	0	0	0	0.126461	0	0.030582	0		0	0	0
	m2	0.5		0	0	0	0	0.114182	0	0.026847	0		0	0	0
	m2	1		0	0	0	0	0.096876	0	0.028969	0		0	0	0
	m2	2		0	0	0	0	0.096016	0	0.027597	0		0	0	0
	m2	3		0	0.100755	0.231681	0	0.088539	0.06713	0.025402	0.03938		0.081507	0	0
	m2	4		0	0.204797	0.619973	0.045209	0.103675	0.35213		0.683717		0.40138	0	0.151277
	m2	6		0.121102	0.305197	0.070872	0.475955	0.11414	0.538701	0.087813	0.483386		0.260214	0	0.125582
	m2	8		0	0.108778	0.191619	0.592275	0.092581	0.162123	0.107211	0.429044		0.0451	0.053071	0.129463
5			201	210	212	220	225	230	233	240	250	255	260	275	280
DHPV Gluc	m5	0		0	0	0			0		0		0
	m5	0.5		0	0	0			0		0		0
	m5	1		0	0	0			0		0		0
	m5	2		0	0	0			0		0		0
	m5	3		0	0	0			0		0		0
	m5	4		0	0.030083	0			0.027542		0.028495		0.026439
	m5	6		0.03718	0.032222	0.029025			0.032454		0.028506		0.023409
	m5	8		0.025607	0.026468	0.026533			0		0.025662		0

## Sheet: Most important metabolites MPC
1
Met-EC-sulph		Tiempo	201	210	212	220	225	230	233	240	250	255	260	275	280
12.2	m1	0				0		0				0	0
	m1	0.5				0		0.03692				0.038144	0
	m1	1				0.039584		0.037903				0.041536	0.0425
	m1	2				0.038024		0.037085				0.042596	0.041666
	m1	3				0.036813		0.036129				0.038381	0.038519
	m1	4				0		0				0.037491	0.037116
	m1	6				0		0				0	0
	m1	8				0		0				0	0
2
DHPV			201	210	212	220	225	230	233	240	250	255	260	275	280
	m2	0	0	0	0	0	0	0	0	0		0	0
	m2	0.5	0	0	0	0	0	0	0	0		0	0
	m2	1	0	0	0	0	0	0	0	0		0	0
	m2	2	0.024337	0	0	0	0	0	0.027527	0.026317		0	0
	m2	3	0.027912	0.02334	0.028017	0.025397	0.026554	0.024369	0.036905	0.029657		0.027912	0.025637
	m2	4	0.031946	0.031825	0.034235	0.039943	0.039627	0.024723	0.040784	0.026984		0.032884	0.034691
	m2	6	0.03025	0.027282	0.036773	0.04408	0.040055	0.026352	0.032396	0.025549		0.049314	0.03648
	m2	8	0.02634	0.032078	0.033632	0.036767	0.0343	0.025634	0.024749	0.027088		0.038275	0.024548
5			201	210	212	220	225	230	233	240	250	255	260	275	280
DHPV gluc	m5	0	0	0	0	0	0	0	0.024096	0.205659		0	0		0
	m5	0.5	0	0	0	0	0	0.024386	0.02529	0.194376		0	0		0
	m5	1	0	0	0	0	0	0.02453	0.079686	0.179684		0	0		0
	m5	2	0.065583	0	0.034054	0	0.024599	0.028035	0.133071	0.12937		0	0.040833		0
	m5	3	0.159852	0.036166	0.126859	0.029155	0.101893	0.02513	0.387252	0.232129		0.175027	0.073371		0
	m5	4	0.317135	0.226827	0.289931	0.467229	0.42438	0.061087	0.482573	0.146234		0.370798	0.26927		0.051574
	m5	6	0.248775	0.113888	0.31616	0.619835	0.392812	0.096655	0.269715	0.102947		0.749167	0.336		0.127749
	m5	8	0.120301	0.223291	0.258957	0.458593	0.28239	0.08309	0.062283	0.129546		0.404833	0.043795		0.097169
4
DHP valerico OH sulph			201	210	212	220	225	230	233	240	250	255	260	275	280
	m4	0	0	0	0	0	0	0	0.025454	0.029697
	m4	0.5	0	0	0	0	0	0	0	0.0299
	m4	1	0	0	0	0	0	0	0	0.029801
	m4	2	0	0	0	0	0	0	0.027561	0.027741
	m4	3	0.025992	0	0	0	0.024734	0	0.033192	0.029649
	m4	4	0.035609	0.030499	0.031459	0.035763	0.037322	0	0.046732	0.029057
	m4	6	0.032132	0.029277	0.033432	0.045172	0.043685	0	0.038724	0.025552
	m4	8	0.028255	0.035534	0.034038	0.03865	0.036285	0.024498	0.026398	0.028706
3
HPV sulph
traces in CC and seen in MPC
			201	210	212	220	225	230	233	240	250	255	260	275	280
	m3	0	0	0	0	0			0	0
	m3	0.5	0	0	0	0			0	0
	m3	1	0	0	0	0			0.027577	0.041744
	m3	2	0	0	0	0			0.028781	0.035709
	m3	3	0.026214	0	0	0.027369			0.037131	0.058432
	m3	4	0.031723	0.02564	0	0.029126			0.050857	0.040933
	m3	6	0.02596	0	0.023427	0.042159			0.033131	0.03412
	m3	8	0	0.025414	0.024007	0.044918			0.025102	0.035197
