# Supplementary material for: Cocoa colonic phenolic metabolites are related to HDL-cholesterol raising effects and methylxanthine metabolites and insoluble dietary fibre to anti-inflammatory and hypoglycemic effects in humans
Source: PeerJ. 2020 Sep 17;8:e9953. doi: 10.7717/peerj.9953 (PMC7502235; doi:10.7717/peerj.9953)
Supplement: Supplemental Information 2 [file peerj-08-9953-s002.xlsx]

## Sheet: Hoja1
Subject	Group	Product	Order	Stage	HDL baseline	HDL washout	HDL cacao	ILB baseline	ILB washout	ILB cocoa	Glucose baseline	Glucose control	Glucose cocoa
100	0	1	2	3	51	52	63	3.175	3.7	1.36	86	80	78
101	0	1	1	1	37	40	46	2.665	1.475	3.155	90	87	84
104	0	1	1	1	57	74	72	3.86	1.835	2.15	80	76	87
106	0	1	2	3					2.73	5.39	84	87	82
109	0	1	2	3	47	44	48	2.8	1.8	5.9			89
110	0	1	1	1	74	72	89	2.93	1.91	1.545	80	78	83
112	0	1	1	1	64	55	68	0.61		4.17	77	71	81
116	0	1	2	3	67	86	81	4.575	4.21	2.28	85	78	85
118	0	1	2	3	75	101	93	0.94	0.86	1.43	82	80	79
120	0	1	1	1	57	70	77	3.26	2.3	1.48	72	67	73
122	0	1	1	1	70	74	78	3.34	3.04	2.66	84	79	83
125	0	1	2	3	76	90	95	3.88	1.66	1.62	76	61	83
127	0	1	1	1				5.17	3.16	1.34	83	80	88
129	0	1	2	3	42	44	46	2.04		1.57	77	86	79
132	0	1	2	3	68	69	71	2.53	5.68667	4.81	79	88	76
135	0	1	1	1	59	71	66	4.635	1.6	2.65	94	94
136	0	1	2	3	65	47	73	2.35	3.06	2.92	93	87	69
137	0	1	2	3	59	72	70	6.21	4.6	4.55	84	82	78
138	0	1	1	1	64	66	57	4.21	2.07	1.13
140	0	1	1	1	43	51	48	4.5	1.05	1.2	82	82	80
143	0	1	2	3	52	54	62	2.71	4.05	2.38	77	82	68
144	0	1	2	3	57	75	63	2.08	3.13	5.77	76	80	75
146	0	1	1	1	45	56	61	1.84	1.485	2.9	74	80	72
147	0	1	2	3	56	61	59	3.76	1.955		76	63	69
103	1	1	1	1				1.84	1.13	0.81
105	1	1	1	1	38	43	47	1.2	1.39	1.06
107	1	1	2	3	48	56	43	4.13	1.77	3.06
111	1	1	2	3	66	70	70	2.84	0.785	0.86
113	1	1	1	1	56	58	50	2.67	1.11	1.81
114	1	1	1	1	59	54	50	0.88	2.585	0.96
115	1	1	2	3	54	61	75	1.59	4.36	2.93
117	1	1	1	1	74	90		3.865	1.1	3.28
119	1	1	2	3	37	42	50	1.715	2.785	3.47
121	1	1	1	1	62	75	75	0.94	3.26	1.32
124	1	1	2	3	80		98	0.96	4.41	0.86
126	1	1	2	3	52	57	57	2.01	2.68	2.95
128	1	1	1	1	54	57	61	3.97		4.22
130	1	1	1	1	47	60	56	2.51	3.455	1.12
131	1	1	1	1	41	44	48	1.445	3.4	2.38
133	1	1	1	1	52	60	61	6.8	2.37	3.62
141	1	1	2	3	47	44	42	2.31	1.79	2.39
142	1	1	1	1	51	56	58	5.68	3.06	3.74
148	1	1	2	3	69	81	81	2.755	2.935	2.23
149	1	1	1	1	36	48	46	4.575	4.24
100	0	2	2	3	51	52	58	2.04		2.76
101	0	2	1	1	37	40	43	2.53	5.68667	0.89
104	0	2	1	1	57	74	61	4.635	1.6	4.85
106	0	2	2	3				2.35	3.06	1.92
109	0	2	2	3	47	44	51	6.21	4.6	1.29
110	0	2	1	1	74	72	79	4.21	2.07	2.86
112	0	2	1	1	64	55	64	4.5	1.05	2.7
116	0	2	2	3	67	86	96	2.71	4.05	1.56
118	0	2	2	3	75		96	2.08	3.13	2.73
120	0	2	1	1	57	70	65	1.84	1.485	3.1
122	0	2	1	1	70	74	86	3.76	1.955	1.08
125	0	2	2	3	76	90	99	3.175	3.7	0.81
127	0	2	1	1				2.665	1.475	2.625
129	0	2	2	3	42	44	35	3.86	1.835	1.1
132	0	2	2	3	68	69	72		2.73	5.04
135	0	2	1	1	59	71	61	2.8	1.8	0.81
136	0	2	2	3	65	47	74	2.93	1.91	1.2
137	0	2	2	3	59	72	52	0.61		5.11
138	0	2	1	1	64	66	67	4.575	4.21	4.185
140	0	2	1	1	43	51	49	0.94	0.86	4.99
143	0	2	2	3	52	54	63	3.26	2.3	0.97
144	0	2	2	3	57	75	73	3.34	3.04	6.105
146	0	2	1	1	45	56	54	3.88	1.66	1.63
147	0	2	2	3	56	61	55	5.17	3.16	2.825
103	1	2	1	1				1.715	2.785	2.565
105	1	2	1	1	38	43	44	0.94	3.26	1.1
107	1	2	2	3	48	56	48	0.96	4.41	0.79
111	1	2	2	3	66	70	67	2.01	2.68	1.07
113	1	2	1	1	56	58	60	3.97		1.22
114	1	2	1	1	59	54	55	2.51	3.455	1.52
115	1	2	2	3	54	61	65	1.445	3.4	2.255
117	1	2	1	1	74		88	6.8	2.37	1.23
119	1	2	2	3	37	42	47	2.31	1.79	1.94
121	1	2	1	1	62	75	67	5.68	3.06	2.49
124	1	2	2	3	80		72	2.755	2.935	3.775
126	1	2	2	3	52	57	63	4.575	4.24	2.94
128	1	2	1	1	54	57	64	1.84	1.13	2.21
130	1	2	1	1	47	60	58	1.2	1.39	1.35
131	1	2	1	1	41	44	48	4.13	1.77	1.33
133	1	2	1	1	52	60	57	2.84	0.785	0.77
141	1	2	2	3	47	44	40	2.67	1.11	1.27
142	1	2	1	1	51	56	56	0.88	2.585	2.49
148	1	2	2	3	69		67	1.59	4.36	2.87
149	1	2	1	1	36	48	54	3.865	1.1	2.59
