# Supplementary material for: Cocoa colonic phenolic metabolites are related to HDL-cholesterol raising effects and methylxanthine metabolites and insoluble dietary fibre to anti-inflammatory and hypoglycemic effects in humans
Source: PeerJ. 2020 Sep 17;8:e9953. doi: 10.7717/peerj.9953 (PMC7502235; doi:10.7717/peerj.9953)
Supplement: Supplemental Information 3 [file peerj-08-9953-s003.xlsx]

## Sheet: Hoja1
Flow 0.6 ml/min				We start from 2 g of product and it is dissolved in 200mL of organic mixture
PRODUCT PC
		Rt	Area	Calibration curve0	Conc uM	PM	Fact conc. (uM= umol/L)	ug/L (in 200mL)	ug in 200mL	ug/g fresh	dry weight	ug/g dry	mg/g dry	mg/kg	ug/g	SD	mg/g dry	SD	mg/kg	SD		mg/g	% Humedad		mg/g peso seco	mg/g dry weight	SD
Polyphenols
	EC		6129	Y=15.093X+ 48.101	402.895	290	40.2895	11684	2336.79	1168.4	1.9006	1229.5	1.2295	1229.5	1199.33	168.253	1.26206	0.177053	1262.06	177.053		1.1684	4.97	95.03	1.2295	1.26206	0.177053
			5506		361.618	290	36.1618	10486.9	2097.38	1048.69	1.9006	1103.54	1.10354	1103.54								1.04869	4.97	95.03	1.10354
			7235		476.174	290	47.6174	13809.1	2761.81	1380.91	1.9006	1453.13	1.45313	1453.13								1.38091	4.97	95.03	1.45313
	PB2		2548	Y=24.353X+ 32.24	165.633	578	16.5633	9573.59	1914.72	957.359	1.9006	1007.43	1.00743	1007.43	1034.59	93.2034	1.0887	0.0980779	1088.7	98.0779		0.957359	4.97	95.03	1.00743	1.0887	0.0980779
			2681		174.445	578	17.4445	10082.9	2016.58	1008.29	1.9006	1061.03	1.06103	1061.03								1.00829	4.97	95.03	1.06103
			3020		196.906	578	19.6906	11381.2	2276.23	1138.12	1.9006	1197.64	1.19764	1197.64								1.13812	4.97	95.03	1.19764
	C		2558	Y=15.612X+ 26.882	166.296	290	16.6296	4822.57	964.514	482.257	1.9006	507.479	0.507479	507.479	447.672	30.5016	0.471084	0.0320968	471.084	32.0968		0.482257	4.97	95.03	0.507479	0.471084	0.0320968
			2318		150.394	290	15.0394	4361.43	872.286	436.143	1.9006	458.953	0.458953	458.953								0.436143	4.97	95.03	0.458953
			2258		146.419	290	14.6419	4246.15	849.229	424.615	1.9006	446.822	0.446822	446.822								0.424615	4.97	95.03	0.446822
	PB1		608.4	Y=24.353X+ 32.24	37.1231	578	3.71231	2145.72	429.143	214.572	1.9006	225.793	0.225793	225.793	185.582	40.998	0.195287	0.0431422	195.287	43.1422		0.214572	4.97	95.03	0.225793	0.195287	0.0431422
			457		27.092	578	2.7092	1565.92	313.183	156.592	1.9006	164.781	0.164781	164.781								0.156592	4.97	95.03	0.164781
						578	0	0	0	0	1.9006	0	0	0								0	4.97	95.03	0
	TB		109964	y=35,113x+1843,9	3079.23	180	307.923	55426.1	11085.2	5542.61	1.9006	5832.49	5.83249	5832.49	6106.29	794.843	6.42564	0.836412	6425.64	836.412		5.54261	4.97	95.03	5.83249	6.42564	0.836412
			138694		3897.45	180	389.745	70154	14030.8	7015.4	1.9006	7382.3	7.3823	7382.3								7.0154	4.97	95.03	7.3823
			114221		3200.47	180	320.047	57608.4	11521.7	5760.84	1.9006	6062.13	6.06213	6062.13								5.76084	4.97	95.03	6.06213
	TF		0	Y=41,295x-314,75	7.62199	180	0.762199	137.196	27.4392	13.7196	1.9006	14.4371	0.0144371	14.4371	13.7196	0	0.0144371	2.12459e-18	14.4371	0		0.0137196	4.97	95.03	0.0144371	0.0144371	0
			0		7.62199	180	0.762199	137.196	27.4392	13.7196	1.9006	14.4371	0.0144371	14.4371								0.0137196	4.97	95.03	0.0144371
			0		7.62199	180	0.762199	137.196	27.4392	13.7196	1.9006	14.4371	0.0144371	14.4371								0.0137196	4.97	95.03	0.0144371
	CF		16681	Y=43,451x-288,96	390.554	194	39.0554	7576.75	1515.35	757.675	1.9006	797.301	0.797301	797.301	836.344	75.9145	0.880085	0.0798848	880.085	79.8848		0.757675	4.97	95.03	0.797301	0.880085	0.0798848
			18574		434.12	194	43.412	8421.93	1684.39	842.193	1.9006	886.239	0.886239	886.239								0.842193	4.97	95.03	0.886239
			20074		468.642	194	46.8642	9091.65	1818.33	909.165	1.9006	956.714	0.956714	956.714								0.909165	4.97	95.03	0.956714
PRODUCT DFC
		Rt	Area	Calibration curve0	Conc uM	PM	Fact conc. (uM= umol/L)	ug/L (in 200mL)	ug in 200mL	ug/g fresh	dry weight	ug/g dry	mg/g dry	mg/kg	ug/g	SD	mg/g dry	SD	mg/kg	SD		mg/g	% Humedad		mg/g peso seco	mg/g dry weight	SD
Polyphenols
	EC		2188	Y=15.093X+ 48.101	141.781	290	14.1781	4111.65	822.329	411.165	1.9306	425.945	0.425945	425.945	314.133	84.9692	0.325425	0.0880236	325.425	88.0236		0.411165	3.47	96.53	0.425945	0.325425	0.0880236
			1496		95.9318	290	9.59318	2782.02	556.405	278.202	1.9306	288.203	0.288203	288.203								0.278202	3.47	96.53	0.288203
			1365		87.2523	290	8.72523	2530.32	506.063	253.032	1.9306	262.128	0.262128	262.128								0.253032	3.47	96.53	0.262128
	PB2			Y=24.353X+ 32.24		578	0	0	0	0	1.9306	0	0	0	553.337	110.484	0.573228	0.114455	573.228	114.455		0	3.47	96.53	0	0.573228	0.114455
			1697		109.249	578	10.9249	6314.61	1262.92	631.461	1.9306	654.16	0.65416	654.16								0.631461	3.47	96.53	0.65416
			1289		82.2169	578	8.22169	4752.13	950.427	475.213	1.9306	492.296	0.492296	492.296								0.475213	3.47	96.53	0.492296
	C			Y=15.612X+ 26.882		290	0	0	0	0	1.9306	0	0	0	602.154	113.583	0.6238	0.117666	623.8	117.666		0	3.47	96.53	0	0.6238	0.117666
			3600		235.334	290	23.5334	6824.69	1364.94	682.469	1.9306	707.002	0.707002	707.002								0.682469	3.47	96.53	0.707002
			2764		179.944	290	17.9944	5218.38	1043.68	521.838	1.9306	540.597	0.540597	540.597								0.521838	3.47	96.53	0.540597
	PB1		0	Y=24.353X+ 32.24		578	0	0	0	0	1.9306	0	0	0	0	0	0	0	0	0		0	3.47	96.53	0	0	0
			0			578	0	0	0	0	1.9306	0	0	0								0	3.47	96.53	0
			0			578	0	0	0	0	1.9306	0	0	0								0	3.47	96.53	0
	TB		94994	y=35,113x+1843,9	2652.89	180	265.289	47752.1	9550.41	4775.21	1.9306	4946.86	4.94686	4946.86	4928.26	132.666	5.10542	0.137435	5105.42	137.435		4.77521	3.47	96.53	4.94686	5.10542	0.137435
			99364		2777.35	180	277.735	49992.3	9998.45	4999.23	1.9306	5178.93	5.17893	5178.93								4.99923	3.47	96.53	5.17893
			99581		2783.53	180	278.353	50103.5	10020.7	5010.35	1.9306	5190.46	5.19046	5190.46								5.01035	3.47	96.53	5.19046
	TF			Y=41,295x-314,75		180	0	0	0	0	1.9306	0	0	0	0	0	0	0	0	0		0	3.47	96.53	0	0	0
						180	0	0	0	0	1.9306	0	0	0								0	3.47	96.53	0
						180	0	0	0	0	1.9306	0	0	0								0	3.47	96.53	0
	CF		9524	Y=43,451x-288,96	225.84	194	22.584	4381.29	876.258	438.129	1.9306	453.879	0.453879	453.879	493.001	47.6163	0.510723	0.049328	510.723	49.328		0.438129	3.47	96.53	0.453879	0.510723	0.049328
			11435		269.82	194	26.982	5234.51	1046.9	523.451	1.9306	542.268	0.542268	542.268								0.523451	3.47	96.53	0.542268
			11300		266.713	194	26.6713	5174.24	1034.85	517.424	1.9306	536.024	0.536024	536.024								0.517424	3.47	96.53	0.536024
PRODUCT CC
		Rt	Area	Calibration curve0	Conc uM	PM	Fact conc. (uM= umol/L)	ug/L (in 200mL)	ug in 200mL	ug/g fresh	dry weight	ug/g dry	mg/g dry	mg/kg	ug/g	SD	mg/g dry	SD	mg/kg	SD		mg/g	% Humedad		mg/g peso seco	mg/g dry weight	SD
Polifenoles
	EC		2630	Y=15.093X+ 48.101	171.066	290	17.1066	4960.91	992.183	496.091	1.8688	530.92	0.53092	530.92	532.086	68.4224	0.569441	0.073226	569.441	73.226		0.496091	6.56	93.44	0.53092	0.569441	0.073226
			2594		168.681	290	16.8681	4891.74	978.349	489.174	1.8688	523.517	0.523517	523.517								0.489174	6.56	93.44	0.523517
			3228		210.687	290	21.0687	6109.92	1221.98	610.992	1.8688	653.887	0.653887	653.887								0.610992	6.56	93.44	0.653887
	PB2		864	Y=24.353X+ 32.24	54.0581	578	5.40581	3124.56	624.912	312.456	1.8688	334.392	0.334392	334.392	363.645	44.4007	0.389175	0.0475178	389.175	47.5178		0.312456	6.56	93.44	0.334392	0.389175	0.0475178
			1058		66.9117	578	6.69117	3867.5	773.5	386.75	1.8688	413.902	0.413902	413.902								0.38675	6.56	93.44	0.413902
			1071		67.7731	578	6.77731	3917.28	783.457	391.728	1.8688	419.23	0.41923	419.23								0.391728	6.56	93.44	0.41923
	C		1758	Y=15.612X+ 26.882	113.291	290	11.3291	3285.44	657.087	328.544	1.8688	351.609	0.351609	351.609	297.16	27.8237	0.318023	0.0297771	318.023	29.7771		0.328544	6.56	93.44	0.351609	0.318023	0.0297771
			1482		95.0042	290	9.50042	2755.12	551.025	275.512	1.8688	294.855	0.294855	294.855								0.275512	6.56	93.44	0.294855
			1544		99.1121	290	9.91121	2874.25	574.85	287.425	1.8688	307.604	0.307604	307.604								0.287425	6.56	93.44	0.307604
	PB1			Y=24.353X+ 32.24		578	0	0	0	0	1.8688	0	0	0	37.1083	17.3307	0.0397136	0.0185475	39.7136	18.5475		0	6.56	93.44	0	0.0397136	0.0185475
			177		8.54032	578	0.854032	493.63	98.7261	49.363	1.8688	52.8286	0.0528286	52.8286								0.049363	6.56	93.44	0.0528286
			113		4.29994	578	0.429994	248.537	49.7073	24.8537	1.8688	26.5985	0.0265985	26.5985								0.0248537	6.56	93.44	0.0265985
	TB		105074	y=35,113x+1843,9	2939.97	180	293.997	52919.4	10583.9	5291.94	1.8688	5663.46	5.66346	5663.46	5258.82	51.8654	5.62802	0.0555066	5628.02	55.5066		5.29194	6.56	93.44	5.66346	5.62802	0.0555066
			103262		2888.36	180	288.836	51990.5	10398.1	5199.05	1.8688	5564.05	5.56405	5564.05								5.19905	6.56	93.44	5.56405
			104948		2936.38	180	293.638	52854.8	10571	5285.48	1.8688	5656.55	5.65655	5656.55								5.28548	6.56	93.44	5.65655
	TF		0	Y=41,295x-314,75		180	0	0	0	0	1.8688	0	0	0	0	0	0	0	0	0		0	6.56	93.44	0	0	0
			0			180	0	0	0	0	1.8688	0	0	0								0	6.56	93.44	0
			0			180	0	0	0	0	1.8688	0	0	0								0	6.56	93.44	0
	CF		12024	Y=43,451x-288,96	283.376	194	28.3376	5497.49	1099.5	549.749	1.8688	588.344	0.588344	588.344	613.119	56.5662	0.656164	0.0605375	656.164	60.5375		0.549749	6.56	93.44	0.588344	0.656164	0.0605375
			13846		325.308	194	32.5308	6310.98	1262.2	631.098	1.8688	675.404	0.675404	675.404								0.631098	6.56	93.44	0.675404
			14460		339.439	194	33.9439	6585.11	1317.02	658.511	1.8688	704.743	0.704743	704.743								0.658511	6.56	93.44	0.704743
PRODUCT MPC
		Rt	Area	Calibration curve0	Conc uM	PM	Fact conc. (uM= umol/L)	ug/L (in 200mL)	ug in 200mL	ug/g fresh	dry weight	ug/g dry	mg/g dry	mg/kg	ug/g	SD	mg/g dry	SD	mg/kg	SD		mg/g	% Humedad		mg/g peso seco	mg/g dry weight	SD
Polifenoles
	EC		5441	Y=15.093X+ 48.101	357.311	290	35.7311	10362	2072.41	1036.2	1.866	1110.61	1.11061	1110.61	1072.2	52.8318	1.14919	0.0566258	1149.19	56.6258		1.0362	6.7	93.3	1.11061	1.14919	0.0566258
			5944		390.638	290	39.0638	11328.5	2265.7	1132.85	1.866	1214.2	1.2142	1214.2								1.13285	6.7	93.3	1.2142
			5500		361.22	290	36.122	10475.4	2095.08	1047.54	1.866	1122.76	1.12276	1122.76								1.04754	6.7	93.3	1.12276
	PB2		1896	Y=24.353X+ 32.24	122.434	578	12.2434	7076.7	1415.34	707.67	1.866	758.488	0.758488	758.488	769.071	53.8685	0.824299	0.0577369	824.299	57.7369		0.70767	6.7	93.3	0.758488	0.824299	0.0577369
			2159		139.859	578	13.9859	8083.88	1616.78	808.388	1.866	866.439	0.866439	866.439								0.808388	6.7	93.3	0.866439
			2114		136.878	578	13.6878	7911.55	1582.31	791.155	1.866	847.968	0.847968	847.968								0.791155	6.7	93.3	0.847968
	C		2551	Y=15.612X+ 26.882	165.832	290	16.5832	4809.12	961.824	480.912	1.866	515.447	0.515447	515.447	496.54	39.4759	0.532197	0.0423107	532.197	42.3107		0.480912	6.7	93.3	0.515447	0.532197	0.0423107
			2866		186.702	290	18.6702	5414.37	1082.87	541.437	1.866	580.318	0.580318	580.318								0.541437	6.7	93.3	0.580318
			2480		161.128	290	16.1128	4672.7	934.54	467.27	1.866	500.825	0.500825	500.825								0.46727	6.7	93.3	0.500825
	PB1		642	Y=24.353X+ 32.24	39.3493	578	3.93493	2274.39	454.878	227.439	1.866	243.772	0.243772	243.772	217.61	15.7169	0.233237	0.0168455	233.237	16.8455		0.227439	6.7	93.3	0.243772	0.233237	0.0168455
			638		39.0843	578	3.90843	2259.07	451.814	225.907	1.866	242.13	0.24213	242.13								0.225907	6.7	93.3	0.24213
			569		34.5126	578	3.45126	1994.83	398.966	199.483	1.866	213.808	0.213808	213.808								0.199483	6.7	93.3	0.213808
	TB		130048	y=35,113x+1843,9	3651.21	180	365.121	65721.8	13144.4	6572.18	1.866	7044.14	7.04414	7044.14	6604.72	206.979	7.07901	0.221842	7079.01	221.842		6.57218	6.7	93.3	7.04414	7.07901	0.221842
			135000		3792.24	180	379.224	68260.4	13652.1	6826.04	1.866	7316.22	7.31622	7316.22								6.82604	6.7	93.3	7.31622
			127000		3564.41	180	356.441	64159.3	12831.9	6415.93	1.866	6876.67	6.87667	6876.67								6.41593	6.7	93.3	6.87667
	TF		2135	Y=41,295x-314,75	59.3232	180	5.93232	1067.82	213.563	106.782	1.866	114.45	0.11445	114.45	124.363	15.2504	0.133293	0.0163455	133.293	16.3455		0.106782	6.7	93.3	0.11445	0.133293	0.0163455
			2720		73.4895	180	7.34895	1322.81	264.562	132.281	1.866	141.78	0.14178	141.78								0.132281	6.7	93.3	0.14178
			2760		74.4582	180	7.44582	1340.25	268.049	134.025	1.866	143.649	0.143649	143.649								0.134025	6.7	93.3	0.143649
	CF		67033	Y=43,451x-288,96	1549.38	194	154.938	30057.9	6011.58	3005.79	1.866	3221.64	3.22164	3221.64	2829.19	263.285	3.03236	0.282192	3032.36	282.192		3.00579	6.7	93.3	3.22164	3.03236	0.282192
			65900		1523.3	194	152.33	29552	5910.41	2955.2	1.866	3167.42	3.16742	3167.42								2.9552	6.7	93.3	3.16742
			56300		1302.36	194	130.236	25265.8	5053.17	2526.58	1.866	2708.02	2.70802	2708.02								2.52658	6.7	93.3	2.70802
PRODUCTO R
		Rt	Area	Calibration curve0	Conc uM	PM	Fact conc. (uM= umol/L)	ug/L (in 200mL)	ug in 200mL	ug/g fresh	dry weight	ug/g dry	mg/g dry	mg/kg	ug/g	SD	mg/g dry	SD	mg/kg	SD		mg/g
Polifenoles
	EC		9694	Y=15.093X+ 48.101	639.098	290	63.9098	18533.8	3706.77	1853.38			1.85338	1853.38	2404.96	501.802	2.40496	0.501802	2404.96	501.802		1.85338
			13200		871.391	290	87.1391	25270.3	5054.07	2527.03			2.52703	2527.03								2.52703
			14800		977.4	290	97.74	28344.6	5668.92	2834.46			2.83446	2834.46								2.83446
	PB2		3454	Y=24.353X+ 32.24	225.661	578	22.5661	13043.2	2608.64	1304.32			1.30432	1304.32	2038.58	680.119	2.03858	0.680119	2038.58	680.119		1.30432
			5700		374.472	578	37.4472	21644.5	4328.89	2164.45			2.16445	2164.45								2.16445
			6960		457.954	578	45.7954	26469.7	5293.95	2646.97			2.64697	2646.97								2.64697
	C		3404	Y=15.612X+ 26.882	222.348	290	22.2348	6448.09	1289.62	644.809			0.644809	644.809	832.98	174.654	0.83298	0.174654	832.98	174.654		0.644809
			4546		298.012	290	29.8012	8642.36	1728.47	864.236			0.864236	864.236								0.864236
			5200		341.344	290	34.1344	9898.96	1979.79	989.896			0.989896	989.896								0.989896
	PB1		918	Y=24.353X+ 32.24	57.6359	578	5.76359	3331.36	666.271	333.136			0.333136	333.136	406.919	113.517	0.406919	0.113517	406.919	113.517		0.333136
			962		60.5512	578	6.05512	3499.86	699.972	349.986			0.349986	349.986								0.349986
			1452		93.0166	578	9.30166	5376.36	1075.27	537.636			0.537636	537.636								0.537636
	TB		123696	y=35,113x+1843,9	3470.31	180	347.031	62465.6	12493.1	6246.56			6.24656	6246.56	6325.3	168.229	6.3253	0.168229	6325.3	168.229		6.24656
			123000		3450.49	180	345.049	62108.8	12421.8	6210.88			6.21088	6210.88								6.21088
			129000		3621.37	180	362.137	65184.6	13036.9	6518.46			6.51846	6518.46								6.51846
	TF		1194	Y=41,295x-314,75	36.5359	180	3.65359	657.646	131.529	65.7646			0.0657646	65.7646	63.2583	3.54452	0.0632583	0.00354452	63.2583	3.54452		0.0657646
			1079		33.7511	180	3.37511	607.519	121.504	60.7519			0.0607519	60.7519								0.0607519
						180	0	0	0	0			0	0								0
	CF		27115	Y=43,451x-288,96	630.687	194	63.0687	12235.3	2447.06	1223.53			1.22353	1223.53	1462.7	213.392	1.4627	0.213392	1462.7	213.392		1.22353
			34000		789.141	194	78.9141	15309.3	3061.87	1530.93			1.53093	1530.93								1.53093
			36300		842.074	194	84.2074	16336.2	3267.25	1633.62			1.63362	1633.62								1.63362
